# Supplementary material for: Changes in Circulating Procalcitonin Versus C-Reactive Protein in Predicting Evolution of Infectious Disease in Febrile, Critically Ill Patients
Source: PLOS journal article supplement (doi:10.1371/journal.pone.0065564), 2013-06-06

Figure S1. Consort diagram

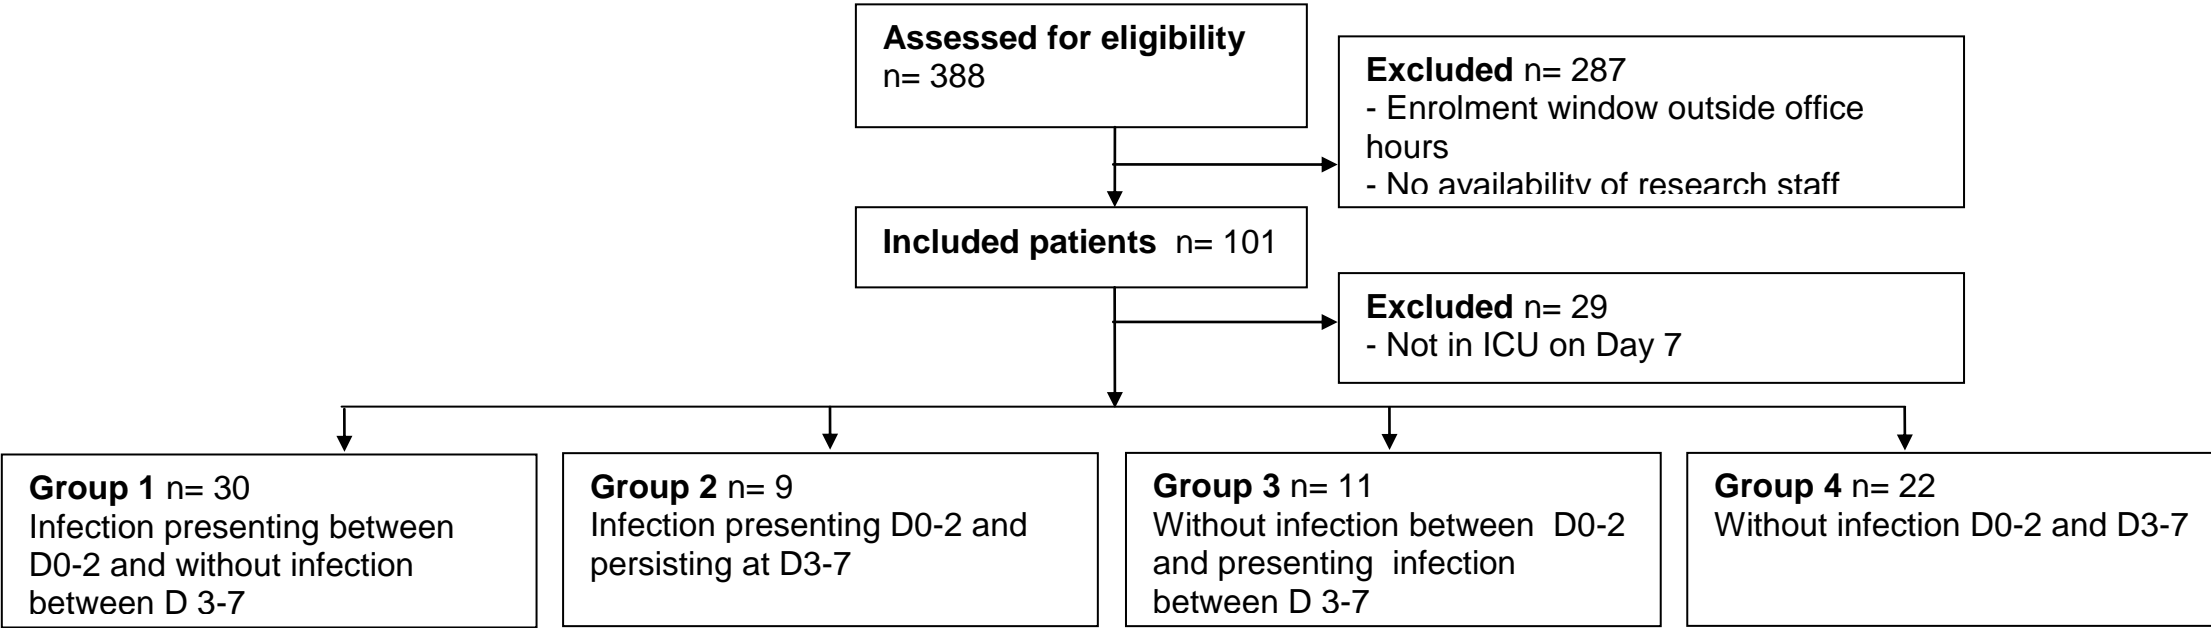

Supplement: S1 (10.1371/journal.pone.0065564.s001) [file journal.pone.0065564.s001]
